# Supplementary material for: Transcriptional Regulation Networks of Cold Hardiness in Galeruca daurica (Coleoptera: Chrysomelidae) and HSF1-Mediated HSP26 and HSP68 Expression Validation
Source: Research Square preprint supplement (doi:10.21203/rs.3.rs-6888513/v1), 2025-06-27
Supplement: Supplementary file 1 [file 989824ac3cc36a861fe0ce07.xlsx]

## Sheet: Table S1
Table S1-Temperature and humidity recorder
Date	Temperature ℃			Humidity %
	Max	Min	Mean	Max	Min	Mean
2020.10.23	18.92	-9.16	4.88	76.11	36.15	56.13
2020.10.24	13.87	-11.32	1.275	80.69	36.09	58.39
2020.10.25	8.25	-8.13	0.06	90.52	40.49	65.505
2020.10.26	9.8	-9	0.4	90.03	42.07	66.05
2020.10.27	11.98	-10.36	0.81	94.41	37.77	66.09
2020.10.28	10.44	-9.4	0.52	83.61	38.69	61.15
2020.10.29	10.03	-9.84	0.095	82.03	37.35	59.69
2020.10.30	12.61	-12.5	0.055	90.87	36.4	63.635
2020.10.31	10.64	-11.94	-0.65	82.68	37.92	60.3
2020.11.1	9.38	-9.13	0.125	75.97	34.78	55.375
2020.11.2	6.28	-8.26	-0.99	83.04	36.4	59.72
2020.11.3	5.61	-9.34	-1.865	74.11	47.93	61.02
2020.11.4	5.76	-11.25	-2.745	82.48	43.17	62.825
2020.11.5	5.67	-10.23	-2.28	90	50.42	70.21
2020.11.6	7.21	-13.04	-2.915	83.51	47.62	65.565
2020.11.7	6.34	-15.14	-4.4	88.19	48.97	68.58
2020.11.8	4.33	-9.1	-2.385	91.05	55.76	73.405
2020.11.9	3.26	-12.59	-4.665	84.71	59.11	71.91
2020.11.10	4.33	-10.34	-3.005	84.5	50.231	67.3655
2020.11.11	3.57	-10.46	-3.445	86.11	47.39	66.75
2020.11.12	-4.24	-13.72	-8.98	71.87	27.53	49.7
2020.11.13	-3.88	-16.49	-10.185	76.25	45.15	60.7
2020.11.14	-3.19	-18.9	-11.045	70.32	44.11	57.215
2020.11.15	-2.9	-19.94	-11.42	76.09	35.72	55.905
2020.11.16	6.25	-16.34	-5.045	82.53	46.78	64.655
2020.11.17	-2.42	-13.54	-7.98	76.53	52.4	64.465
2020.11.18	-2.66	-13.87	-8.265	76.73	56.95	66.84
2020.11.19	-1.3	-13.11	-7.205	77.92	44.38	61.15
2020.11.20	-1.9	-13.64	-7.77	77.84	56.79	67.315
2020.11.21	-5.24	-13.57	-9.405	77.9	42.19	60.045
2020.11.22	-8.67	-9.23	-8.95	85.68	43.72	64.7
2020.11.23	15.91	-11.18	2.365	71.11	26.15	48.63
2020.11.24	9.91	-14.32	-2.205	82.69	26.09	54.39
2020.11.25	4.28	-11.13	-3.425	86.52	37.49	62.005
2020.11.26	6.8	-11	-2.1	84.03	38.07	61.05
2020.11.27	8.98	-13.36	-2.19	84.41	27.77	56.09
2020.11.28	7.44	-11.4	-1.98	72.61	28.69	50.65
2020.11.29	7.03	-11.84	-2.405	72.03	27.35	49.69
2020.11.30	7.61	-15.5	-3.945	80.87	26.4	53.635
2020.12.1	7.64	-12.94	-2.65	74.68	27.92	51.3
2020.12.2	5.38	-11.13	-2.875	65.97	24.78	45.375
2020.12.3	-0.28	-16.26	-8.27	73.04	36.4	54.72
2020.12.4	-0.8	-16.92	-8.86	74.11	37.93	56.02
2020.12.5	-1.06	-17.2	-9.13	79.48	43.17	61.325
2020.12.6	-0.72	-12.34	-6.53	86	46.42	66.21
2020.12.7	-2.76	-17.04	-9.9	74.51	37.62	56.065
2020.12.8	-1.62	-18.14	-9.88	78.19	38.97	58.58
2020.12.9	0.88	-12.1	-5.61	81.05	45.76	63.405
2020.12.10	1.28	-14.59	-6.655	84.81	49.18	66.995
2020.12.11	1.3	-14.34	-6.52	84.5	46.61	65.555
2020.12.12	1.57	-13.46	-5.945	86.49	43.39	64.94
2020.12.13	-4.24	-17.72	-10.98	61.87	29.5	45.685
2020.12.14	-4.88	-21.49	-13.185	66.25	35.15	50.7
2020.12.15	-3.15	-20.9	-12.025	70.32	34.11	52.215
2020.12.16	-2.9	-19.94	-11.42	66.09	34.22	50.155
2020.12.17	-1.25	-19.34	-10.295	72.53	36.64	54.585
2020.12.18	-2.42	-15.84	-9.13	66.53	42.4	54.465
2020.12.19	-2.98	-16.96	-9.97	69.53	46.65	58.09
2020.12.20	-2.16	-17.11	-9.635	71.67	47.38	59.525
2020.12.21	-1.2	-16.64	-8.92	72.84	48.89	60.865
2020.12.22	-1.24	-15.57	-8.405	73.9	52.19	63.045
2020.12.23	-1.87	-14.74	-8.305	75.06	43.72	59.39
2020.12.24	-2.4	-16.64	-9.52	65.37	41.23	53.3
2020.12.25	0.14	-16.21	-8.035	69.11	40.74	54.925
2020.12.26	0.2	-14.82	-7.31	69.3	43.72	56.51
2020.12.27	6.7	-19.38	-6.34	74.77	22.68	48.725
2020.12.28	-2.26	-16.32	-9.29	70.07	32.33	51.2
2020.12.29	-5.92	-23.9	-14.91	50.72	19.46	35.09
2020.12.30	-0.84	-20.5	-10.67	54.41	19.38	36.895
2020.12.31	0.3	-24.33	-12.015	71.37	22.8	47.085
2021.1.1	2.81	-22.2	-9.695	69.29	26.7	47.995
2021.1.2	5.8	-19.38	-6.79	74.77	22.68	48.725
2021.1.3	4.11	-18.28	-7.085	60.56	23.81	42.185
2021.1.4	1.44	-16.54	-7.55	60.82	21.45	41.135
2021.1.5	0.43	-23.14	-11.355	65.11	26.61	45.86
2021.1.6	-12	-25.36	-18.68	49.3	20.98	35.14
2021.1.7	-11.34	-28.04	-19.69	60.49	33.45	46.97
2021.1.8	1.78	-17.2	-7.71	51.37	22.09	36.73
2021.1.9	5.12	-15.92	-5.4	60.65	23.43	42.04
2021.1.10	-5.74	-17.68	-11.71	64.5	38.45	51.475
2021.1.11	3.06	-18.74	-7.84	75.38	27.33	51.355
2021.1.12	0.38	-16.6	-8.11	75.56	32.98	54.27
2021.1.13	0.66	-12.6	-5.97	67.62	29.8	48.71
2021.1.14	2.14	-10.66	-4.26	62.85	31.82	47.335
2021.1.15	-1.14	-12.15	-6.645	65.68	36.84	51.26
2021.1.16	-4.52	-16.98	-10.75	63.69	29.94	46.815
2021.1.17	-1.05	-20.06	-10.555	75.31	30.94	53.125
2021.1.18	3.05	-17.71	-7.33	67.92	26.46	47.19
2021.1.19	8.67	-15.02	-3.175	59.77	22.94	41.355
2021.1.20	4.96	-14.52	-4.78	68.78	30.15	49.465
2021.1.21	5.53	-15.06	-4.765	68.15	29.3	48.725
2021.1.22	6.32	-14.62	-4.15	72.39	29.72	51.055
2021.1.23	9.43	-12.28	-1.425	67.38	28.26	47.82
2021.1.24	10.19	-11.47	-0.64	72.89	30.6	51.745
2021.1.25	4.27	-9.01	-2.37	77.98	47.31	62.645
2021.1.26	3.6	-15.33	-5.865	79.64	30.64	55.14
2021.1.27	4.6	-14.8	-5.1	74.51	34.7	54.605
2021.1.28	0.36	-15.5	-7.57	51.25	25.03	38.14
2021.1.29	4.58	-17.05	-6.235	64.28	31.72	48
2021.1.30	6.62	-14.56	-3.97	75.64	32.26	53.95
2021.1.31	6.96	-13.92	-3.48	77.25	29.63	53.44
2021.2.1	-3	-13.46	-8.23	61.79	30.39	46.09
2021.2.2	-0.06	-21.7	-10.88	55.99	26.48	41.235
2021.2.3	4.48	-15.8	-5.66	57.46	24.26	40.86
2021.2.4	7.48	-16.96	-4.74	64.74	24.64	44.69
2021.2.5	10.31	-13.56	-1.625	65.11	30.13	47.62
2021.2.6	9.35	-10.84	-0.745	71.71	30.03	50.87
2021.2.7	7.74	-9.8	-1.03	71.41	26.46	48.935
2021.2.8	6.7	-13.74	-3.52	63.52	29.27	46.395
2021.2.9	11.75	-11.97	-0.11	70.51	24.62	47.565
2021.2.10	13.96	-11.01	1.475	66.47	24.31	45.39
2021.2.11	14.14	-7.42	3.36	56.87	28.51	42.69
2021.2.12	11.07	-8.68	1.195	65.41	27.35	46.38
2021.2.13	14.32	-7.1	3.61	58.03	25.27	41.65
2021.2.14	5.88	-9.2	-1.66	68.25	32.75	50.5
2021.2.15	6.54	-14.16	-3.81	61.71	28.93	45.32
2021.2.16	3.22	-11.26	-4.02	50.43	22.25	36.34
2021.2.17	10.1	-10.52	-0.21	52.32	25.95	39.135
2021.2.18	12.82	-11.16	0.83	67.11	25.56	46.335
2021.2.19	14.57	-9.96	2.305	65.67	25.65	45.66
2021.2.20	16.92	-5.56	5.68	56.4	20.72	38.56
2021.2.21	19.35	-3.19	8.08	43.97	21.62	32.795
2021.2.22	14.34	-2.74	5.8	68.18	23.82	46
2021.2.23	12.47	-2.41	5.03	46.28	25.92	36.1
2021.2.24	17.33	-6.98	5.175	59.85	20.06	39.955
2021.2.25	18.2	-4.46	6.87	43.39	15.56	29.475
2021.2.26	15.62	-6.91	4.355	41.97	25.29	33.63
2021.2.27	5.68	2.56	4.12	87.03	33.81	60.42
2021.2.28	3.52	-1	1.26	95.36	67.48	81.42
2021.3.1	9.97	-5.84	2.065	84.03	37.76	60.895
2021.3.2	13.7	-8.13	2.785	80.16	32.8	56.48
2021.3.3	15.9	-5.67	5.115	89.47	30.13	59.8
2021.3.4	17	-5.26	5.87	79.53	26.46	52.995
2021.3.5	14.5	-4.44	5.03	71.31	28.53	49.92
2021.3.6	15.7	-6.82	4.44	54.71	17.72	36.215
2021.3.7	17.17	-7.9	4.635	61.55	18.41	39.98
2021.3.8	16.52	-1.6	7.46	74.01	37.2	55.605
2021.3.9	20.15	-3.86	8.145	86.83	29.52	58.175
2021.3.10	20.98	-0.64	10.17	72.37	28.38	50.375
2021.3.11	21.24	-1.52	9.86	86.95	30.08	58.515
2021.3.12	22.25	3.95	13.1	96.26	31.32	63.79
2021.3.13	22.16	-0.92	10.62	81.48	25.76	53.62
2021.3.14	19.91	2.64	11.275	76.57	42.98	59.775
2021.3.15	9.25	-2.32	3.465	43.12	21.33	32.225
2021.3.16	6.2	-3.64	1.28	60.33	21.99	41.16
2021.3.17	12.42	-1.88	5.27	90.57	27.09	58.83
2021.3.18	7.82	2.11	4.965	98.6	85.83	92.215
2021.3.19	7.72	1.44	4.58	97.46	67.71	82.585
2021.3.20	8.27	-2.48	2.895	81.39	31.47	56.43
2021.3.21	12.86	-4.84	4.01	53.94	27.15	40.545
2021.3.22	17.35	-5.56	5.895	82.63	20.95	51.79
2021.3.23	19.03	-4.37	7.33	80.06	27.57	53.815
2021.3.24	23.23	-0.68	11.275	59.51	16.73	38.12
2021.3.25	24.14	-2.33	10.905	57.77	21.59	39.68
2021.3.26	20.71	6.4	13.555	92.05	45.2	68.625
2021.3.27	23.19	0.6	11.895	95.8	17.55	56.675
2021.3.28	17.52	1.75	9.635	41.32	17.4	29.36
2021.3.29	19.63	-0.8	9.415	50.89	18.14	34.515
2021.3.30	20.42	0.54	10.48	57.33	28.35	42.84
2021.3.31	15.63	1.94	8.785	53.8	20.79	37.295
2021.4.1	11.28	5.1	8.19	97.15	33.32	65.235
2021.4.2	15.63	2.92	9.275	100	21.18	60.59
2021.4.3	18.67	-1.12	8.775	81.66	22.55	52.105
2021.4.4	20.67	-2.36	9.155	67.22	17.43	42.325
2021.4.5	11.65	0.68	6.165	97.93	51.03	74.48
2021.4.6	20.39	2.54	11.465	100	41.96	70.98
2021.4.7	25.48	-0.87	12.305	96.73	18.63	57.68
2021.4.8	24.22	0.05	12.135	84.46	22.55	53.505
2021.4.9	25.4	2.77	14.085	78.18	22.73	50.455
2021.4.10	23.76	7.14	15.45	80.02	29.78	54.9
2021.4.11	13.3	9.53	11.415	90.68	64.15	77.415
2021.4.12	11.17	-0.92	5.125	88.04	39.02	63.53
2021.4.13	15.68	-5.68	5	70.52	23.62	47.07
2021.4.14	21.56	-2.8	9.38	73.45	22.02	47.735
2021.4.15	12.74	2.42	7.58	63.94	25.81	44.875
2021.4.16	13.98	0.02	7	59.19	21.48	40.335
2021.4.17	21.05	-5.06	7.995	78.1	22.77	50.435
2021.4.18	25.57	-1.92	11.825	65.74	18.81	42.275
2021.4.19	30.07	2.06	16.065	61.57	16.47	39.02
2021.4.20	32.18	4.74	18.46	52.74	13.81	33.275
2021.4.21	29.01	11.1	20.055	59.14	27.56	43.35
2021.4.22	20.55	11.87	16.21	90.19	56.04	73.115
2021.4.23	26.05	7.74	16.895	78.36	35.73	57.045
2021.4.24	25.49	10.35	17.92	61.02	30.66	45.84
2021.4.25	15.73	11.37	13.55	75.57	45.19	60.38
2021.4.26	17.95	8.96	13.455	81.63	36.33	58.98
2021.4.27	17.65	3.42	10.535	50.08	33.37	41.725
2021.4.28	17.85	2	9.925	54.64	26.33	40.485

## Sheet: Table S2
Table S2 Data filtering statistics of RNA-Seq
Sample	RawDatas	CleanData(%)	Adapter(%)	LowQuality(%)	polyA(%)	N(%)
GdIn1-1	52457940	52354592 (99.80%)	12682 (0.02%)	90666 (0.17%)	0 (0.00%)	0 (0.00%)
GdIn1-2	64442664	64309638 (99.79%)	14296 (0.02%)	118730 (0.18%)	0 (0.00%)	0 (0.00%)
GdIn1-3	64251792	64130550 (99.81%)	13554 (0.02%)	107688 (0.17%)	0 (0.00%)	0 (0.00%)
GdIn2-1	44728450	44642942 (99.81%)	10104 (0.02%)	75404 (0.17%)	0 (0.00%)	0 (0.00%)
GdIn2-2	62563870	62441470 (99.80%)	14224 (0.02%)	108176 (0.17%)	0 (0.00%)	0 (0.00%)
GdIn2-3	48791108	48696786 (99.81%)	11698 (0.02%)	82624 (0.17%)	0 (0.00%)	0 (0.00%)
GdOut1-1	51834974	51769460 (99.87%)	11954 (0.02%)	53560 (0.10%)	0 (0.00%)	0 (0.00%)
GdOut1-2	49177008	49107780 (99.86%)	12228 (0.02%)	57000 (0.12%)	0 (0.00%)	0 (0.00%)
GdOut1-3	56634058	56546298 (99.85%)	15208 (0.03%)	72552 (0.13%)	0 (0.00%)	0 (0.00%)
GdOut2-1	58742710	58637240 (99.82%)	14388 (0.02%)	91082 (0.16%)	0 (0.00%)	0 (0.00%)
GdOut2-2	49147076	49044226 (99.79%)	12172 (0.02%)	90678 (0.18%)	0 (0.00%)	0 (0.00%)
GdOut2-3	55862068	55756072 (99.81%)	12960 (0.02%)	93036 (0.17%)	0 (0.00%)	0 (0.00%)

## Sheet: Table S3 
Table S3 Base quality analysis statistic of RNA-Seq
Sample	RawData(bp)	Before Filter_Q20(%)	Before Filter_Q30(%)	Before Filter_GC(%)	CleanData(bp)	After Filter_Q20(%)	After Filter_Q30(%)	After Filter_GC(%)
GdIn1-1	7868691000	7697737591 (97.83%)	7370656848 (93.67%)	2993016145 (38.04%)	7821545317	7659238556 (97.92%)	7336365092 (93.80%)	2969609262 (37.97%)
GdIn1-2	9666399600	9445513644 (97.71%)	9029024313 (93.41%)	3666131973 (37.93%)	9610162638	9401029986 (97.82%)	8989851880 (93.55%)	3638634051 (37.86%)
GdIn1-3	9637768800	9428228204 (97.83%)	9023026369 (93.62%)	3666255376 (38.04%)	9574509683	9375898229 (97.93%)	8976246234 (93.75%)	3635141260 (37.97%)
GdIn2-1	6709267500	6563150808 (97.82%)	6284901282 (93.67%)	2571760030 (38.33%)	6671794795	6533128478 (97.92%)	6258393750 (93.80%)	2553442246 (38.27%)
GdIn2-2	9384580500	9180321897 (97.82%)	8790409544 (93.67%)	3589696825 (38.25%)	9326137146	9132504781 (97.92%)	8747853597 (93.80%)	3560940863 (38.18%)
GdIn2-3	7318666200	7161282062 (97.85%)	6858298165 (93.71%)	2791735959 (38.15%)	7273801496	7124376742 (97.95%)	6825326439 (93.83%)	2769459929 (38.07%)
GdOut1-1	7775246100	7618433034 (97.98%)	7297194472 (93.85%)	2959400122 (38.06%)	7739227007	7588820585 (98.06%)	7270656849 (93.95%)	2941487552 (38.01%)
GdOut1-2	7376551200	7231536080 (98.03%)	6934744460 (94.01%)	2777150107 (37.65%)	7339787066	7201456754 (98.12%)	6907826479 (94.11%)	2759176494 (37.59%)
GdOut1-3	8495108700	8326884290 (98.02%)	7985693311 (94.00%)	3209105069 (37.78%)	8446190442	8286250942 (98.11%)	7949096830 (94.11%)	3184642353 (37.71%)
GdOut2-1	8811406500	8631172127 (97.95%)	8279958600 (93.97%)	3328987881 (37.78%)	8758174325	8587046351 (98.05%)	8240331939 (94.09%)	3302440001 (37.71%)
GdOut2-2	7372061400	7202773372 (97.70%)	6883411014 (93.37%)	2783508073 (37.76%)	7332381361	7171703970 (97.81%)	6856194071 (93.51%)	2763885748 (37.69%)
GdOut2-3	8379310200	8198811869 (97.85%)	7852251405 (93.71%)	3166477082 (37.79%)	8328710770	8157378641 (97.94%)	7815262733 (93.84%)	3141374073 (37.72%)

## Sheet: Table S4
Table S4 RNA-Seq assembly quality
Genes Number	GC %	N50 Number of Unigene	N50 Length of Unigene (bp)	Max Length of Unigene (bp)	Min Length of Unigene (bp)	Average Length of Unigene (bp)	Total Assembled Bases
76194	35.0836	9764	1839	41827	201	944	71933873

## Sheet: Table S5
Table S5 Database Annotation Statistics Table
Total Unigenes	Nr	KEGG	KOG	SwissProt	Annotation genes	Without annotation gene
76194	37020	31632	15419	16994	37446	38748

## Sheet: Table S6
Table S6. The modules and 1,710 clustered genes in WGCNA.
Gene	Module
Unigene0000869	black
Unigene0000963	black
Unigene0001669	black
Unigene0002114	black
Unigene0002211	black
Unigene0002226	black
Unigene0002257	black
Unigene0002358	black
Unigene0002442	black
Unigene0002655	black
Unigene0005773	black
Unigene0006201	black
Unigene0007186	black
Unigene0009665	black
Unigene0010515	black
Unigene0012788	black
Unigene0012801	black
Unigene0012934	black
Unigene0013191	black
Unigene0014109	black
Unigene0014576	black
Unigene0014639	black
Unigene0016100	black
Unigene0016370	black
Unigene0017257	black
Unigene0019601	black
Unigene0020189	black
Unigene0021226	black
Unigene0021465	black
Unigene0021605	black
Unigene0022315	black
Unigene0023038	black
Unigene0023241	black
Unigene0023290	black
Unigene0023579	black
Unigene0024231	black
Unigene0024645	black
Unigene0024691	black
Unigene0025294	black
Unigene0027062	black
Unigene0027303	black
Unigene0027726	black
Unigene0028618	black
Unigene0029917	black
Unigene0030517	black
Unigene0031230	black
Unigene0033252	black
Unigene0034111	black
Unigene0035118	black
Unigene0035424	black
Unigene0036197	black
Unigene0036893	black
Unigene0036915	black
Unigene0039468	black
Unigene0039802	black
Unigene0039890	black
Unigene0039960	black
Unigene0041276	black
Unigene0042049	black
Unigene0042529	black
Unigene0042693	black
Unigene0043238	black
Unigene0043553	black
Unigene0043985	black
Unigene0044367	black
Unigene0044978	black
Unigene0045397	black
Unigene0045465	black
Unigene0046776	black
Unigene0047630	black
Unigene0048007	black
Unigene0049699	black
Unigene0049714	black
Unigene0049984	black
Unigene0050487	black
Unigene0051598	black
Unigene0051807	black
Unigene0054399	black
Unigene0055363	black
Unigene0056072	black
Unigene0056361	black
Unigene0056641	black
Unigene0058575	black
Unigene0060173	black
Unigene0060282	black
Unigene0061248	black
Unigene0061783	black
Unigene0062118	black
Unigene0062689	black
Unigene0063591	black
Unigene0064292	black
Unigene0064748	black
Unigene0066964	black
Unigene0067063	black
Unigene0067261	black
Unigene0068227	black
Unigene0068288	black
Unigene0069779	black
Unigene0070475	black
Unigene0071780	black
Unigene0072048	black
Unigene0074840	black
Unigene0075026	black
Unigene0075488	black
Unigene0075717	black
Unigene0000652	blue
Unigene0001138	blue
Unigene0001143	blue
Unigene0001154	blue
Unigene0001172	blue
Unigene0001235	blue
Unigene0001329	blue
Unigene0001330	blue
Unigene0001493	blue
Unigene0001687	blue
Unigene0001720	blue
Unigene0001721	blue
Unigene0001767	blue
Unigene0001772	blue
Unigene0001821	blue
Unigene0001836	blue
Unigene0001871	blue
Unigene0001997	blue
Unigene0002006	blue
Unigene0002075	blue
Unigene0002154	blue
Unigene0002157	blue
Unigene0002492	blue
Unigene0002789	blue
Unigene0002817	blue
Unigene0002961	blue
Unigene0003084	blue
Unigene0003257	blue
Unigene0003653	blue
Unigene0003932	blue
Unigene0004214	blue
Unigene0004392	blue
Unigene0004601	blue
Unigene0004670	blue
Unigene0005117	blue
Unigene0005369	blue
Unigene0006254	blue
Unigene0006351	blue
Unigene0006616	blue
Unigene0006674	blue
Unigene0006911	blue
Unigene0008394	blue
Unigene0008923	blue
Unigene0008999	blue
Unigene0009511	blue
Unigene0010087	blue
Unigene0010229	blue
Unigene0010450	blue
Unigene0010780	blue
Unigene0010939	blue
Unigene0010986	blue
Unigene0011586	blue
Unigene0011684	blue
Unigene0012775	blue
Unigene0012857	blue
Unigene0013047	blue
Unigene0013090	blue
Unigene0013260	blue
Unigene0013667	blue
Unigene0013936	blue
Unigene0014257	blue
Unigene0014587	blue
Unigene0015159	blue
Unigene0015165	blue
Unigene0015176	blue
Unigene0015734	blue
Unigene0016043	blue
Unigene0017721	blue
Unigene0018320	blue
Unigene0018663	blue
Unigene0019137	blue
Unigene0019301	blue
Unigene0020027	blue
Unigene0020112	blue
Unigene0020200	blue
Unigene0020704	blue
Unigene0021447	blue
Unigene0021781	blue
Unigene0022129	blue
Unigene0022284	blue
Unigene0022458	blue
Unigene0023678	blue
Unigene0023919	blue
Unigene0024365	blue
Unigene0024698	blue
Unigene0024699	blue
Unigene0025388	blue
Unigene0025765	blue
Unigene0026175	blue
Unigene0026460	blue
Unigene0026520	blue
Unigene0026834	blue
Unigene0027311	blue
Unigene0028194	blue
Unigene0028371	blue
Unigene0028629	blue
Unigene0028746	blue
Unigene0028991	blue
Unigene0029895	blue
Unigene0030285	blue
Unigene0030660	blue
Unigene0030828	blue
Unigene0031569	blue
Unigene0031850	blue
Unigene0032116	blue
Unigene0032392	blue
Unigene0032764	blue
Unigene0033098	blue
Unigene0033556	blue
Unigene0033641	blue
Unigene0033723	blue
Unigene0034257	blue
Unigene0034715	blue
Unigene0035154	blue
Unigene0035657	blue
Unigene0035778	blue
Unigene0035945	blue
Unigene0035953	blue
Unigene0036087	blue
Unigene0036894	blue
Unigene0037129	blue
Unigene0037272	blue
Unigene0038015	blue
Unigene0038184	blue
Unigene0038734	blue
Unigene0038863	blue
Unigene0039473	blue
Unigene0039739	blue
Unigene0040548	blue
Unigene0041078	blue
Unigene0041355	blue
Unigene0041533	blue
Unigene0042033	blue
Unigene0042465	blue
Unigene0042533	blue
Unigene0043141	blue
Unigene0043258	blue
Unigene0043855	blue
Unigene0043872	blue
Unigene0044135	blue
Unigene0045205	blue
Unigene0046028	blue
Unigene0046570	blue
Unigene0047303	blue
Unigene0048010	blue
Unigene0049068	blue
Unigene0050729	blue
Unigene0051233	blue
Unigene0051355	blue
Unigene0051573	blue
Unigene0051720	blue
Unigene0052383	blue
Unigene0052684	blue
Unigene0053024	blue
Unigene0053210	blue
Unigene0053341	blue
Unigene0053588	blue
Unigene0054069	blue
Unigene0055466	blue
Unigene0055758	blue
Unigene0056650	blue
Unigene0056978	blue
Unigene0056979	blue
Unigene0057795	blue
Unigene0058055	blue
Unigene0058721	blue
Unigene0058886	blue
Unigene0059160	blue
Unigene0059293	blue
Unigene0059657	blue
Unigene0060673	blue
Unigene0061553	blue
Unigene0062189	blue
Unigene0062912	blue
Unigene0063173	blue
Unigene0063698	blue
Unigene0064111	blue
Unigene0064551	blue
Unigene0064787	blue
Unigene0064807	blue
Unigene0065125	blue
Unigene0065811	blue
Unigene0066855	blue
Unigene0069638	blue
Unigene0069777	blue
Unigene0070624	blue
Unigene0070766	blue
Unigene0071092	blue
Unigene0071383	blue
Unigene0071395	blue
Unigene0071501	blue
Unigene0071729	blue
Unigene0071730	blue
Unigene0072827	blue
Unigene0073006	blue
Unigene0073055	blue
Unigene0073110	blue
Unigene0073570	blue
Unigene0073680	blue
Unigene0073681	blue
Unigene0073682	blue
Unigene0074428	blue
Unigene0074526	blue
Unigene0074949	blue
Unigene0075404	blue
Unigene0075696	blue
Unigene0075816	blue
Unigene0000589	brown
Unigene0000822	brown
Unigene0001011	brown
Unigene0001077	brown
Unigene0001102	brown
Unigene0001315	brown
Unigene0001388	brown
Unigene0001437	brown
Unigene0001556	brown
Unigene0001564	brown
Unigene0001581	brown
Unigene0001584	brown
Unigene0001741	brown
Unigene0001989	brown
Unigene0002005	brown
Unigene0002155	brown
Unigene0002338	brown
Unigene0002366	brown
Unigene0002596	brown
Unigene0002790	brown
Unigene0002956	brown
Unigene0003554	brown
Unigene0004793	brown
Unigene0005113	brown
Unigene0005193	brown
Unigene0005808	brown
Unigene0006251	brown
Unigene0006695	brown
Unigene0006804	brown
Unigene0006969	brown
Unigene0007010	brown
Unigene0007047	brown
Unigene0007054	brown
Unigene0007784	brown
Unigene0008044	brown
Unigene0009132	brown
Unigene0009207	brown
Unigene0009236	brown
Unigene0009296	brown
Unigene0010056	brown
Unigene0010448	brown
Unigene0010872	brown
Unigene0012854	brown
Unigene0013426	brown
Unigene0013541	brown
Unigene0014384	brown
Unigene0014589	brown
Unigene0015870	brown
Unigene0016044	brown
Unigene0016517	brown
Unigene0016649	brown
Unigene0016904	brown
Unigene0017301	brown
Unigene0017390	brown
Unigene0017954	brown
Unigene0018072	brown
Unigene0018509	brown
Unigene0018510	brown
Unigene0019236	brown
Unigene0020478	brown
Unigene0020939	brown
Unigene0020954	brown
Unigene0022343	brown
Unigene0022434	brown
Unigene0022463	brown
Unigene0022886	brown
Unigene0023243	brown
Unigene0023246	brown
Unigene0023735	brown
Unigene0023809	brown
Unigene0025064	brown
Unigene0025281	brown
Unigene0025410	brown
Unigene0025578	brown
Unigene0026058	brown
Unigene0026354	brown
Unigene0026487	brown
Unigene0026690	brown
Unigene0026692	brown
Unigene0026846	brown
Unigene0027414	brown
Unigene0028203	brown
Unigene0028447	brown
Unigene0029374	brown
Unigene0029757	brown
Unigene0030403	brown
Unigene0032569	brown
Unigene0032864	brown
Unigene0033633	brown
Unigene0033659	brown
Unigene0034045	brown
Unigene0034058	brown
Unigene0034241	brown
Unigene0034392	brown
Unigene0035449	brown
Unigene0035842	brown
Unigene0037142	brown
Unigene0037324	brown
Unigene0038403	brown
Unigene0038408	brown
Unigene0038580	brown
Unigene0042023	brown
Unigene0042276	brown
Unigene0042277	brown
Unigene0042415	brown
Unigene0042567	brown
Unigene0043897	brown
Unigene0044321	brown
Unigene0044554	brown
Unigene0044714	brown
Unigene0045627	brown
Unigene0045965	brown
Unigene0047119	brown
Unigene0048011	brown
Unigene0048045	brown
Unigene0048566	brown
Unigene0048804	brown
Unigene0048865	brown
Unigene0051132	brown
Unigene0051602	brown
Unigene0052597	brown
Unigene0052731	brown
Unigene0053025	brown
Unigene0053982	brown
Unigene0054896	brown
Unigene0055321	brown
Unigene0056441	brown
Unigene0056686	brown
Unigene0057045	brown
Unigene0057844	brown
Unigene0057993	brown
Unigene0058166	brown
Unigene0058914	brown
Unigene0059096	brown
Unigene0059131	brown
Unigene0059410	brown
Unigene0060130	brown
Unigene0060533	brown
Unigene0061504	brown
Unigene0061668	brown
Unigene0061991	brown
Unigene0063052	brown
Unigene0063468	brown
Unigene0064134	brown
Unigene0064698	brown
Unigene0065320	brown
Unigene0065540	brown
Unigene0065563	brown
Unigene0065854	brown
Unigene0066601	brown
Unigene0066689	brown
Unigene0066749	brown
Unigene0067226	brown
Unigene0067610	brown
Unigene0067862	brown
Unigene0068125	brown
Unigene0068638	brown
Unigene0069332	brown
Unigene0069478	brown
Unigene0069662	brown
Unigene0069685	brown
Unigene0069998	brown
Unigene0070999	brown
Unigene0071057	brown
Unigene0071091	brown
Unigene0071433	brown
Unigene0071615	brown
Unigene0071616	brown
Unigene0072205	brown
Unigene0072431	brown
Unigene0073086	brown
Unigene0073330	brown
Unigene0073785	brown
Unigene0075322	brown
Unigene0075704	brown
Unigene0075826	brown
Unigene0000629	green
Unigene0000857	green
Unigene0001039	green
Unigene0001177	green
Unigene0001378	green
Unigene0001491	green
Unigene0001508	green
Unigene0001664	green
Unigene0001740	green
Unigene0001833	green
Unigene0001895	green
Unigene0002617	green
Unigene0002656	green
Unigene0002783	green
Unigene0003791	green
Unigene0003890	green
Unigene0004055	green
Unigene0004509	green
Unigene0005247	green
Unigene0006250	green
Unigene0008023	green
Unigene0008254	green
Unigene0008638	green
Unigene0008642	green
Unigene0009650	green
Unigene0010112	green
Unigene0010384	green
Unigene0010449	green
Unigene0011520	green
Unigene0011651	green
Unigene0011865	green
Unigene0011944	green
Unigene0012332	green
Unigene0012377	green
Unigene0012843	green
Unigene0013423	green
Unigene0013648	green
Unigene0014182	green
Unigene0014750	green
Unigene0016005	green
Unigene0016059	green
Unigene0016861	green
Unigene0017072	green
Unigene0017136	green
Unigene0019230	green
Unigene0020993	green
Unigene0021389	green
Unigene0022608	green
Unigene0023488	green
Unigene0025067	green
Unigene0025918	green
Unigene0027165	green
Unigene0027468	green
Unigene0029610	green
Unigene0029756	green
Unigene0031140	green
Unigene0031980	green
Unigene0032979	green
Unigene0034457	green
Unigene0034476	green
Unigene0034649	green
Unigene0035094	green
Unigene0035774	green
Unigene0036318	green
Unigene0036366	green
Unigene0036408	green
Unigene0037169	green
Unigene0037852	green
Unigene0038685	green
Unigene0038701	green
Unigene0038864	green
Unigene0039497	green
Unigene0039542	green
Unigene0039725	green
Unigene0039727	green
Unigene0041850	green
Unigene0041951	green
Unigene0043261	green
Unigene0043296	green
Unigene0044580	green
Unigene0046017	green
Unigene0046359	green
Unigene0048122	green
Unigene0049171	green
Unigene0049176	green
Unigene0050451	green
Unigene0053215	green
Unigene0053283	green
Unigene0055326	green
Unigene0055828	green
Unigene0056364	green
Unigene0057503	green
Unigene0057804	green
Unigene0058781	green
Unigene0058828	green
Unigene0061007	green
Unigene0062147	green
Unigene0062623	green
Unigene0062688	green
Unigene0063340	green
Unigene0063375	green
Unigene0063388	green
Unigene0063636	green
Unigene0064586	green
Unigene0064719	green
Unigene0066319	green
Unigene0066320	green
Unigene0066777	green
Unigene0071059	green
Unigene0071224	green
Unigene0071429	green
Unigene0071732	green
Unigene0072025	green
Unigene0073800	green
Unigene0074595	green
Unigene0074602	green
Unigene0074647	green
Unigene0075141	green
Unigene0075142	green
Unigene0075319	green
Unigene0001186	grey
Unigene0001195	grey
Unigene0001311	grey
Unigene0001505	grey
Unigene0001567	grey
Unigene0001568	grey
Unigene0001729	grey
Unigene0001735	grey
Unigene0002131	grey
Unigene0002611	grey
Unigene0004423	grey
Unigene0005601	grey
Unigene0008842	grey
Unigene0009288	grey
Unigene0009436	grey
Unigene0009437	grey
Unigene0009554	grey
Unigene0010213	grey
Unigene0010214	grey
Unigene0012635	grey
Unigene0013408	grey
Unigene0014866	grey
Unigene0015283	grey
Unigene0016302	grey
Unigene0018891	grey
Unigene0020056	grey
Unigene0020221	grey
Unigene0021204	grey
Unigene0022337	grey
Unigene0022505	grey
Unigene0023250	grey
Unigene0024924	grey
Unigene0026031	grey
Unigene0026785	grey
Unigene0027953	grey
Unigene0036048	grey
Unigene0036320	grey
Unigene0036755	grey
Unigene0037461	grey
Unigene0039652	grey
Unigene0040425	grey
Unigene0040918	grey
Unigene0040924	grey
Unigene0042591	grey
Unigene0043628	grey
Unigene0047602	grey
Unigene0055160	grey
Unigene0055336	grey
Unigene0055785	grey
Unigene0060920	grey
Unigene0062208	grey
Unigene0068244	grey
Unigene0072799	grey
Unigene0073784	grey
Unigene0075190	grey
Unigene0000841	magenta
Unigene0000967	magenta
Unigene0001276	magenta
Unigene0001405	magenta
Unigene0001748	magenta
Unigene0001760	magenta
Unigene0002059	magenta
Unigene0002147	magenta
Unigene0002273	magenta
Unigene0003293	magenta
Unigene0004307	magenta
Unigene0005679	magenta
Unigene0005711	magenta
Unigene0005771	magenta
Unigene0006252	magenta
Unigene0006256	magenta
Unigene0007602	magenta
Unigene0007914	magenta
Unigene0008493	magenta
Unigene0009445	magenta
Unigene0009522	magenta
Unigene0009885	magenta
Unigene0010805	magenta
Unigene0011302	magenta
Unigene0017907	magenta
Unigene0020631	magenta
Unigene0020720	magenta
Unigene0021279	magenta
Unigene0022006	magenta
Unigene0023366	magenta
Unigene0023577	magenta
Unigene0023849	magenta
Unigene0024413	magenta
Unigene0028798	magenta
Unigene0029872	magenta
Unigene0032317	magenta
Unigene0034922	magenta
Unigene0034955	magenta
Unigene0036815	magenta
Unigene0037087	magenta
Unigene0038311	magenta
Unigene0039179	magenta
Unigene0039385	magenta
Unigene0039690	magenta
Unigene0044712	magenta
Unigene0045338	magenta
Unigene0046249	magenta
Unigene0046387	magenta
Unigene0046987	magenta
Unigene0048415	magenta
Unigene0048678	magenta
Unigene0054732	magenta
Unigene0057302	magenta
Unigene0057814	magenta
Unigene0062575	magenta
Unigene0063558	magenta
Unigene0063673	magenta
Unigene0064117	magenta
Unigene0064329	magenta
Unigene0064811	magenta
Unigene0065212	magenta
Unigene0065589	magenta
Unigene0068111	magenta
Unigene0070478	magenta
Unigene0070815	magenta
Unigene0070817	magenta
Unigene0072206	magenta
Unigene0073287	magenta
Unigene0000998	pink
Unigene0001515	pink
Unigene0001615	pink
Unigene0001625	pink
Unigene0001715	pink
Unigene0001734	pink
Unigene0001747	pink
Unigene0002015	pink
Unigene0002595	pink
Unigene0002679	pink
Unigene0004931	pink
Unigene0005678	pink
Unigene0006690	pink
Unigene0007046	pink
Unigene0007520	pink
Unigene0009199	pink
Unigene0009524	pink
Unigene0010723	pink
Unigene0011929	pink
Unigene0012529	pink
Unigene0012603	pink
Unigene0012642	pink
Unigene0013769	pink
Unigene0013798	pink
Unigene0014801	pink
Unigene0015514	pink
Unigene0018010	pink
Unigene0018201	pink
Unigene0018238	pink
Unigene0018537	pink
Unigene0019071	pink
Unigene0019213	pink
Unigene0021028	pink
Unigene0021031	pink
Unigene0021386	pink
Unigene0021400	pink
Unigene0021538	pink
Unigene0021775	pink
Unigene0022370	pink
Unigene0023301	pink
Unigene0024094	pink
Unigene0024114	pink
Unigene0024364	pink
Unigene0024477	pink
Unigene0024598	pink
Unigene0024703	pink
Unigene0026267	pink
Unigene0028647	pink
Unigene0029897	pink
Unigene0030332	pink
Unigene0030473	pink
Unigene0030520	pink
Unigene0031250	pink
Unigene0031629	pink
Unigene0034157	pink
Unigene0035769	pink
Unigene0038641	pink
Unigene0039159	pink
Unigene0039474	pink
Unigene0040638	pink
Unigene0041271	pink
Unigene0041534	pink
Unigene0041767	pink
Unigene0043263	pink
Unigene0043621	pink
Unigene0043866	pink
Unigene0043898	pink
Unigene0045464	pink
Unigene0046386	pink
Unigene0046407	pink
Unigene0046488	pink
Unigene0046988	pink
Unigene0047161	pink
Unigene0047601	pink
Unigene0048338	pink
Unigene0048690	pink
Unigene0051721	pink
Unigene0052601	pink
Unigene0053497	pink
Unigene0054033	pink
Unigene0054682	pink
Unigene0057154	pink
Unigene0057380	pink
Unigene0058613	pink
Unigene0060230	pink
Unigene0060907	pink
Unigene0060924	pink
Unigene0061963	pink
Unigene0064412	pink
Unigene0064715	pink
Unigene0066086	pink
Unigene0067932	pink
Unigene0068566	pink
Unigene0068676	pink
Unigene0068680	pink
Unigene0069132	pink
Unigene0071222	pink
Unigene0071975	pink
Unigene0072281	pink
Unigene0073199	pink
Unigene0073285	pink
Unigene0074895	pink
Unigene0000703	red
Unigene0000956	red
Unigene0000987	red
Unigene0001068	red
Unigene0001106	red
Unigene0001153	red
Unigene0001557	red
Unigene0001566	red
Unigene0001585	red
Unigene0001616	red
Unigene0001685	red
Unigene0001924	red
Unigene0002139	red
Unigene0002377	red
Unigene0002383	red
Unigene0002396	red
Unigene0002549	red
Unigene0003396	red
Unigene0003845	red
Unigene0004280	red
Unigene0004943	red
Unigene0005290	red
Unigene0005320	red
Unigene0005712	red
Unigene0006228	red
Unigene0007205	red
Unigene0007603	red
Unigene0008751	red
Unigene0009556	red
Unigene0009886	red
Unigene0010231	red
Unigene0011388	red
Unigene0011687	red
Unigene0012122	red
Unigene0012902	red
Unigene0012923	red
Unigene0013877	red
Unigene0014483	red
Unigene0014505	red
Unigene0015297	red
Unigene0018321	red
Unigene0019036	red
Unigene0021257	red
Unigene0021459	red
Unigene0021654	red
Unigene0021957	red
Unigene0022057	red
Unigene0022336	red
Unigene0022520	red
Unigene0024097	red
Unigene0024693	red
Unigene0025573	red
Unigene0026268	red
Unigene0027718	red
Unigene0028156	red
Unigene0028528	red
Unigene0028877	red
Unigene0029119	red
Unigene0031315	red
Unigene0035771	red
Unigene0036141	red
Unigene0036166	red
Unigene0037072	red
Unigene0038293	red
Unigene0039316	red
Unigene0039913	red
Unigene0039978	red
Unigene0040208	red
Unigene0040415	red
Unigene0042532	red
Unigene0043016	red
Unigene0043871	red
Unigene0044711	red
Unigene0045582	red
Unigene0046684	red
Unigene0047822	red
Unigene0048785	red
Unigene0048948	red
Unigene0051022	red
Unigene0052284	red
Unigene0052335	red
Unigene0052450	red
Unigene0052508	red
Unigene0053806	red
Unigene0055082	red
Unigene0055856	red
Unigene0056100	red
Unigene0056599	red
Unigene0057737	red
Unigene0057803	red
Unigene0058612	red
Unigene0060635	red
Unigene0061237	red
Unigene0064091	red
Unigene0064871	red
Unigene0067641	red
Unigene0067725	red
Unigene0068416	red
Unigene0070390	red
Unigene0070796	red
Unigene0071018	red
Unigene0071824	red
Unigene0071929	red
Unigene0071987	red
Unigene0072049	red
Unigene0072139	red
Unigene0072371	red
Unigene0073028	red
Unigene0073695	red
Unigene0073944	red
Unigene0074145	red
Unigene0074412	red
Unigene0074865	red
Unigene0075229	red
Unigene0075321	red
Unigene0000017	turquoise
Unigene0000022	turquoise
Unigene0000086	turquoise
Unigene0000121	turquoise
Unigene0000339	turquoise
Unigene0000343	turquoise
Unigene0000381	turquoise
Unigene0000424	turquoise
Unigene0000615	turquoise
Unigene0000931	turquoise
Unigene0000954	turquoise
Unigene0000968	turquoise
Unigene0000985	turquoise
Unigene0001009	turquoise
Unigene0001026	turquoise
Unigene0001032	turquoise
Unigene0001071	turquoise
Unigene0001075	turquoise
Unigene0001076	turquoise
Unigene0001120	turquoise
Unigene0001222	turquoise
Unigene0001259	turquoise
Unigene0001312	turquoise
Unigene0001387	turquoise
Unigene0001389	turquoise
Unigene0001413	turquoise
Unigene0001495	turquoise
Unigene0001544	turquoise
Unigene0001547	turquoise
Unigene0001548	turquoise
Unigene0001551	turquoise
Unigene0001561	turquoise
Unigene0001573	turquoise
Unigene0001574	turquoise
Unigene0001576	turquoise
Unigene0001580	turquoise
Unigene0001619	turquoise
Unigene0001624	turquoise
Unigene0001648	turquoise
Unigene0001655	turquoise
Unigene0001663	turquoise
Unigene0001665	turquoise
Unigene0001686	turquoise
Unigene0001719	turquoise
Unigene0001724	turquoise
Unigene0001738	turquoise
Unigene0001739	turquoise
Unigene0001800	turquoise
Unigene0001810	turquoise
Unigene0001843	turquoise
Unigene0001912	turquoise
Unigene0001916	turquoise
Unigene0001939	turquoise
Unigene0001955	turquoise
Unigene0001990	turquoise
Unigene0002051	turquoise
Unigene0002113	turquoise
Unigene0002133	turquoise
Unigene0002167	turquoise
Unigene0002217	turquoise
Unigene0002228	turquoise
Unigene0002242	turquoise
Unigene0002256	turquoise
Unigene0002318	turquoise
Unigene0002344	turquoise
Unigene0002361	turquoise
Unigene0002494	turquoise
Unigene0002508	turquoise
Unigene0002566	turquoise
Unigene0002633	turquoise
Unigene0002692	turquoise
Unigene0002694	turquoise
Unigene0002711	turquoise
Unigene0002747	turquoise
Unigene0002895	turquoise
Unigene0002909	turquoise
Unigene0002914	turquoise
Unigene0003055	turquoise
Unigene0003076	turquoise
Unigene0003135	turquoise
Unigene0003163	turquoise
Unigene0003221	turquoise
Unigene0003247	turquoise
Unigene0003324	turquoise
Unigene0003386	turquoise
Unigene0003399	turquoise
Unigene0003458	turquoise
Unigene0003534	turquoise
Unigene0003639	turquoise
Unigene0003695	turquoise
Unigene0003702	turquoise
Unigene0003715	turquoise
Unigene0003774	turquoise
Unigene0003780	turquoise
Unigene0003807	turquoise
Unigene0003822	turquoise
Unigene0003874	turquoise
Unigene0003880	turquoise
Unigene0003952	turquoise
Unigene0004024	turquoise
Unigene0004074	turquoise
Unigene0004291	turquoise
Unigene0004316	turquoise
Unigene0004352	turquoise
Unigene0004427	turquoise
Unigene0004527	turquoise
Unigene0004581	turquoise
Unigene0004651	turquoise
Unigene0004734	turquoise
Unigene0004776	turquoise
Unigene0004956	turquoise
Unigene0004958	turquoise
Unigene0005009	turquoise
Unigene0005106	turquoise
Unigene0005254	turquoise
Unigene0005295	turquoise
Unigene0005316	turquoise
Unigene0005694	turquoise
Unigene0005696	turquoise
Unigene0005904	turquoise
Unigene0005905	turquoise
Unigene0005919	turquoise
Unigene0006065	turquoise
Unigene0006133	turquoise
Unigene0006262	turquoise
Unigene0006263	turquoise
Unigene0006368	turquoise
Unigene0006463	turquoise
Unigene0006542	turquoise
Unigene0006732	turquoise
Unigene0006749	turquoise
Unigene0006772	turquoise
Unigene0006783	turquoise
Unigene0006812	turquoise
Unigene0006867	turquoise
Unigene0006908	turquoise
Unigene0007106	turquoise
Unigene0007170	turquoise
Unigene0007277	turquoise
Unigene0007631	turquoise
Unigene0007637	turquoise
Unigene0007682	turquoise
Unigene0007700	turquoise
Unigene0007742	turquoise
Unigene0008012	turquoise
Unigene0008092	turquoise
Unigene0008387	turquoise
Unigene0008395	turquoise
Unigene0008447	turquoise
Unigene0008801	turquoise
Unigene0008969	turquoise
Unigene0009165	turquoise
Unigene0009200	turquoise
Unigene0009266	turquoise
Unigene0009311	turquoise
Unigene0009313	turquoise
Unigene0009398	turquoise
Unigene0009549	turquoise
Unigene0009573	turquoise
Unigene0009664	turquoise
Unigene0009816	turquoise
Unigene0009909	turquoise
Unigene0009944	turquoise
Unigene0009957	turquoise
Unigene0009999	turquoise
Unigene0010108	turquoise
Unigene0010145	turquoise
Unigene0010447	turquoise
Unigene0010538	turquoise
Unigene0010765	turquoise
Unigene0010804	turquoise
Unigene0010808	turquoise
Unigene0010810	turquoise
Unigene0010863	turquoise
Unigene0010888	turquoise
Unigene0010941	turquoise
Unigene0010967	turquoise
Unigene0011126	turquoise
Unigene0011478	turquoise
Unigene0011494	turquoise
Unigene0011498	turquoise
Unigene0011503	turquoise
Unigene0011559	turquoise
Unigene0011585	turquoise
Unigene0011606	turquoise
Unigene0011688	turquoise
Unigene0011707	turquoise
Unigene0011725	turquoise
Unigene0011956	turquoise
Unigene0011995	turquoise
Unigene0012331	turquoise
Unigene0012333	turquoise
Unigene0012334	turquoise
Unigene0012353	turquoise
Unigene0012372	turquoise
Unigene0012849	turquoise
Unigene0012912	turquoise
Unigene0012927	turquoise
Unigene0012931	turquoise
Unigene0012956	turquoise
Unigene0013078	turquoise
Unigene0013276	turquoise
Unigene0013326	turquoise
Unigene0013446	turquoise
Unigene0013939	turquoise
Unigene0014112	turquoise
Unigene0014273	turquoise
Unigene0014302	turquoise
Unigene0014487	turquoise
Unigene0014746	turquoise
Unigene0014806	turquoise
Unigene0015141	turquoise
Unigene0015142	turquoise
Unigene0015143	turquoise
Unigene0015245	turquoise
Unigene0015382	turquoise
Unigene0015809	turquoise
Unigene0015917	turquoise
Unigene0016015	turquoise
Unigene0016096	turquoise
Unigene0016212	turquoise
Unigene0016314	turquoise
Unigene0016343	turquoise
Unigene0016647	turquoise
Unigene0016738	turquoise
Unigene0017073	turquoise
Unigene0017194	turquoise
Unigene0017273	turquoise
Unigene0017281	turquoise
Unigene0017300	turquoise
Unigene0017749	turquoise
Unigene0018033	turquoise
Unigene0018071	turquoise
Unigene0018279	turquoise
Unigene0018395	turquoise
Unigene0018566	turquoise
Unigene0018795	turquoise
Unigene0019131	turquoise
Unigene0019151	turquoise
Unigene0019458	turquoise
Unigene0019815	turquoise
Unigene0020222	turquoise
Unigene0020280	turquoise
Unigene0020333	turquoise
Unigene0020639	turquoise
Unigene0020646	turquoise
Unigene0020928	turquoise
Unigene0021321	turquoise
Unigene0021388	turquoise
Unigene0021406	turquoise
Unigene0021619	turquoise
Unigene0021658	turquoise
Unigene0021715	turquoise
Unigene0021726	turquoise
Unigene0022433	turquoise
Unigene0023163	turquoise
Unigene0023174	turquoise
Unigene0023382	turquoise
Unigene0023404	turquoise
Unigene0023984	turquoise
Unigene0024036	turquoise
Unigene0024037	turquoise
Unigene0024075	turquoise
Unigene0024150	turquoise
Unigene0024476	turquoise
Unigene0024478	turquoise
Unigene0024555	turquoise
Unigene0024597	turquoise
Unigene0024603	turquoise
Unigene0024740	turquoise
Unigene0024793	turquoise
Unigene0025265	turquoise
Unigene0025501	turquoise
Unigene0025528	turquoise
Unigene0025674	turquoise
Unigene0025887	turquoise
Unigene0026132	turquoise
Unigene0026154	turquoise
Unigene0026305	turquoise
Unigene0026408	turquoise
Unigene0026592	turquoise
Unigene0026647	turquoise
Unigene0026696	turquoise
Unigene0027010	turquoise
Unigene0027412	turquoise
Unigene0027727	turquoise
Unigene0027787	turquoise
Unigene0027848	turquoise
Unigene0027904	turquoise
Unigene0027982	turquoise
Unigene0027984	turquoise
Unigene0028138	turquoise
Unigene0028727	turquoise
Unigene0029379	turquoise
Unigene0029407	turquoise
Unigene0029935	turquoise
Unigene0029964	turquoise
Unigene0030107	turquoise
Unigene0030147	turquoise
Unigene0030318	turquoise
Unigene0030519	turquoise
Unigene0030563	turquoise
Unigene0030661	turquoise
Unigene0030803	turquoise
Unigene0030816	turquoise
Unigene0030913	turquoise
Unigene0031160	turquoise
Unigene0031229	turquoise
Unigene0031269	turquoise
Unigene0031658	turquoise
Unigene0031673	turquoise
Unigene0031950	turquoise
Unigene0031979	turquoise
Unigene0032100	turquoise
Unigene0032247	turquoise
Unigene0032360	turquoise
Unigene0032571	turquoise
Unigene0032758	turquoise
Unigene0033070	turquoise
Unigene0033140	turquoise
Unigene0033249	turquoise
Unigene0033253	turquoise
Unigene0033496	turquoise
Unigene0033740	turquoise
Unigene0033796	turquoise
Unigene0034039	turquoise
Unigene0034049	turquoise
Unigene0034059	turquoise
Unigene0034400	turquoise
Unigene0034680	turquoise
Unigene0034839	turquoise
Unigene0035096	turquoise
Unigene0035156	turquoise
Unigene0035218	turquoise
Unigene0035221	turquoise
Unigene0035285	turquoise
Unigene0035419	turquoise
Unigene0035845	turquoise
Unigene0035895	turquoise
Unigene0035897	turquoise
Unigene0036147	turquoise
Unigene0036354	turquoise
Unigene0036356	turquoise
Unigene0036743	turquoise
Unigene0037274	turquoise
Unigene0037559	turquoise
Unigene0037845	turquoise
Unigene0037897	turquoise
Unigene0038142	turquoise
Unigene0038327	turquoise
Unigene0038437	turquoise
Unigene0038558	turquoise
Unigene0038898	turquoise
Unigene0038899	turquoise
Unigene0039318	turquoise
Unigene0039327	turquoise
Unigene0039452	turquoise
Unigene0039526	turquoise
Unigene0039533	turquoise
Unigene0039622	turquoise
Unigene0039700	turquoise
Unigene0039724	turquoise
Unigene0039917	turquoise
Unigene0039976	turquoise
Unigene0039979	turquoise
Unigene0040253	turquoise
Unigene0040312	turquoise
Unigene0040469	turquoise
Unigene0040740	turquoise
Unigene0040927	turquoise
Unigene0041114	turquoise
Unigene0041192	turquoise
Unigene0041497	turquoise
Unigene0041512	turquoise
Unigene0041696	turquoise
Unigene0041809	turquoise
Unigene0041852	turquoise
Unigene0042032	turquoise
Unigene0042085	turquoise
Unigene0042188	turquoise
Unigene0042217	turquoise
Unigene0042285	turquoise
Unigene0042356	turquoise
Unigene0042424	turquoise
Unigene0042493	turquoise
Unigene0042494	turquoise
Unigene0042579	turquoise
Unigene0042589	turquoise
Unigene0042934	turquoise
Unigene0042946	turquoise
Unigene0043206	turquoise
Unigene0043260	turquoise
Unigene0043293	turquoise
Unigene0043310	turquoise
Unigene0043391	turquoise
Unigene0043427	turquoise
Unigene0043453	turquoise
Unigene0043550	turquoise
Unigene0043821	turquoise
Unigene0043834	turquoise
Unigene0043835	turquoise
Unigene0044194	turquoise
Unigene0044232	turquoise
Unigene0044439	turquoise
Unigene0044929	turquoise
Unigene0045114	turquoise
Unigene0045166	turquoise
Unigene0045396	turquoise
Unigene0045447	turquoise
Unigene0045448	turquoise
Unigene0045812	turquoise
Unigene0045871	turquoise
Unigene0045976	turquoise
Unigene0046022	turquoise
Unigene0046255	turquoise
Unigene0046256	turquoise
Unigene0046289	turquoise
Unigene0046639	turquoise
Unigene0047048	turquoise
Unigene0047165	turquoise
Unigene0047329	turquoise
Unigene0047726	turquoise
Unigene0047885	turquoise
Unigene0048123	turquoise
Unigene0048218	turquoise
Unigene0048266	turquoise
Unigene0048505	turquoise
Unigene0048866	turquoise
Unigene0048877	turquoise
Unigene0048982	turquoise
Unigene0049072	turquoise
Unigene0049079	turquoise
Unigene0049214	turquoise
Unigene0049443	turquoise
Unigene0049668	turquoise
Unigene0049712	turquoise
Unigene0049983	turquoise
Unigene0050858	turquoise
Unigene0051040	turquoise
Unigene0051367	turquoise
Unigene0051427	turquoise
Unigene0051868	turquoise
Unigene0052261	turquoise
Unigene0052498	turquoise
Unigene0052565	turquoise
Unigene0052577	turquoise
Unigene0052627	turquoise
Unigene0052666	turquoise
Unigene0052674	turquoise
Unigene0052719	turquoise
Unigene0052940	turquoise
Unigene0052984	turquoise
Unigene0053088	turquoise
Unigene0053186	turquoise
Unigene0053189	turquoise
Unigene0053241	turquoise
Unigene0053373	turquoise
Unigene0053486	turquoise
Unigene0053526	turquoise
Unigene0053818	turquoise
Unigene0054034	turquoise
Unigene0054233	turquoise
Unigene0054433	turquoise
Unigene0054858	turquoise
Unigene0054887	turquoise
Unigene0055159	turquoise
Unigene0055464	turquoise
Unigene0055929	turquoise
Unigene0056067	turquoise
Unigene0056172	turquoise
Unigene0056212	turquoise
Unigene0057523	turquoise
Unigene0057553	turquoise
Unigene0057652	turquoise
Unigene0057775	turquoise
Unigene0057857	turquoise
Unigene0058281	turquoise
Unigene0058326	turquoise
Unigene0058611	turquoise
Unigene0058671	turquoise
Unigene0058706	turquoise
Unigene0058718	turquoise
Unigene0059180	turquoise
Unigene0059219	turquoise
Unigene0059295	turquoise
Unigene0059404	turquoise
Unigene0059536	turquoise
Unigene0059613	turquoise
Unigene0059614	turquoise
Unigene0059644	turquoise
Unigene0059963	turquoise
Unigene0060241	turquoise
Unigene0060328	turquoise
Unigene0061030	turquoise
Unigene0061297	turquoise
Unigene0061310	turquoise
Unigene0061432	turquoise
Unigene0061582	turquoise
Unigene0061858	turquoise
Unigene0061952	turquoise
Unigene0061995	turquoise
Unigene0062518	turquoise
Unigene0062630	turquoise
Unigene0062640	turquoise
Unigene0062992	turquoise
Unigene0063147	turquoise
Unigene0063442	turquoise
Unigene0063523	turquoise
Unigene0063524	turquoise
Unigene0063748	turquoise
Unigene0063901	turquoise
Unigene0063918	turquoise
Unigene0063948	turquoise
Unigene0064009	turquoise
Unigene0064052	turquoise
Unigene0064339	turquoise
Unigene0064395	turquoise
Unigene0064520	turquoise
Unigene0064547	turquoise
Unigene0064771	turquoise
Unigene0064815	turquoise
Unigene0065053	turquoise
Unigene0065289	turquoise
Unigene0065484	turquoise
Unigene0065659	turquoise
Unigene0065700	turquoise
Unigene0065704	turquoise
Unigene0065714	turquoise
Unigene0065720	turquoise
Unigene0065762	turquoise
Unigene0065776	turquoise
Unigene0065829	turquoise
Unigene0065852	turquoise
Unigene0066082	turquoise
Unigene0066140	turquoise
Unigene0066172	turquoise
Unigene0066506	turquoise
Unigene0066513	turquoise
Unigene0066747	turquoise
Unigene0066865	turquoise
Unigene0066961	turquoise
Unigene0066987	turquoise
Unigene0067143	turquoise
Unigene0067597	turquoise
Unigene0067621	turquoise
Unigene0067939	turquoise
Unigene0068176	turquoise
Unigene0068350	turquoise
Unigene0068438	turquoise
Unigene0068689	turquoise
Unigene0069291	turquoise
Unigene0069338	turquoise
Unigene0069414	turquoise
Unigene0069490	turquoise
Unigene0069591	turquoise
Unigene0069889	turquoise
Unigene0069919	turquoise
Unigene0069931	turquoise
Unigene0069973	turquoise
Unigene0070005	turquoise
Unigene0070273	turquoise
Unigene0070534	turquoise
Unigene0070678	turquoise
Unigene0070714	turquoise
Unigene0070802	turquoise
Unigene0071058	turquoise
Unigene0071387	turquoise
Unigene0071396	turquoise
Unigene0071650	turquoise
Unigene0071669	turquoise
Unigene0071965	turquoise
Unigene0072022	turquoise
Unigene0072159	turquoise
Unigene0072193	turquoise
Unigene0072203	turquoise
Unigene0072207	turquoise
Unigene0072372	turquoise
Unigene0072542	turquoise
Unigene0073114	turquoise
Unigene0073286	turquoise
Unigene0073358	turquoise
Unigene0073653	turquoise
Unigene0073783	turquoise
Unigene0073786	turquoise
Unigene0073998	turquoise
Unigene0074099	turquoise
Unigene0074144	turquoise
Unigene0074230	turquoise
Unigene0074399	turquoise
Unigene0074662	turquoise
Unigene0074839	turquoise
Unigene0075188	turquoise
Unigene0075211	turquoise
Unigene0075212	turquoise
Unigene0075270	turquoise
Unigene0075406	turquoise
Unigene0075489	turquoise
Unigene0075571	turquoise
Unigene0075595	turquoise
Unigene0075781	turquoise
Unigene0076106	turquoise
Unigene0076133	turquoise
Unigene0000146	yellow
Unigene0001045	yellow
Unigene0001109	yellow
Unigene0001185	yellow
Unigene0001333	yellow
Unigene0001418	yellow
Unigene0001492	yellow
Unigene0001575	yellow
Unigene0001628	yellow
Unigene0001881	yellow
Unigene0001937	yellow
Unigene0001967	yellow
Unigene0001988	yellow
Unigene0002064	yellow
Unigene0002171	yellow
Unigene0002259	yellow
Unigene0002431	yellow
Unigene0002436	yellow
Unigene0002618	yellow
Unigene0005772	yellow
Unigene0007614	yellow
Unigene0008135	yellow
Unigene0008457	yellow
Unigene0008494	yellow
Unigene0008639	yellow
Unigene0008924	yellow
Unigene0009289	yellow
Unigene0009888	yellow
Unigene0009923	yellow
Unigene0011403	yellow
Unigene0011436	yellow
Unigene0011493	yellow
Unigene0011766	yellow
Unigene0012043	yellow
Unigene0013258	yellow
Unigene0013356	yellow
Unigene0014197	yellow
Unigene0014404	yellow
Unigene0014711	yellow
Unigene0015055	yellow
Unigene0016650	yellow
Unigene0018008	yellow
Unigene0018475	yellow
Unigene0018786	yellow
Unigene0019054	yellow
Unigene0019114	yellow
Unigene0019677	yellow
Unigene0020188	yellow
Unigene0020774	yellow
Unigene0021011	yellow
Unigene0021404	yellow
Unigene0021527	yellow
Unigene0021592	yellow
Unigene0021652	yellow
Unigene0021653	yellow
Unigene0022053	yellow
Unigene0022202	yellow
Unigene0022223	yellow
Unigene0022537	yellow
Unigene0022708	yellow
Unigene0024644	yellow
Unigene0026088	yellow
Unigene0027208	yellow
Unigene0027423	yellow
Unigene0027431	yellow
Unigene0028338	yellow
Unigene0029172	yellow
Unigene0029924	yellow
Unigene0029968	yellow
Unigene0030119	yellow
Unigene0030862	yellow
Unigene0031806	yellow
Unigene0032132	yellow
Unigene0032134	yellow
Unigene0033642	yellow
Unigene0034112	yellow
Unigene0034113	yellow
Unigene0035465	yellow
Unigene0035775	yellow
Unigene0038318	yellow
Unigene0038443	yellow
Unigene0038700	yellow
Unigene0039317	yellow
Unigene0039479	yellow
Unigene0040940	yellow
Unigene0041140	yellow
Unigene0041575	yellow
Unigene0041699	yellow
Unigene0041853	yellow
Unigene0041872	yellow
Unigene0042025	yellow
Unigene0042030	yellow
Unigene0042097	yellow
Unigene0042113	yellow
Unigene0042394	yellow
Unigene0043068	yellow
Unigene0043899	yellow
Unigene0044141	yellow
Unigene0044322	yellow
Unigene0044450	yellow
Unigene0045195	yellow
Unigene0045594	yellow
Unigene0045721	yellow
Unigene0045790	yellow
Unigene0046683	yellow
Unigene0047141	yellow
Unigene0049435	yellow
Unigene0049878	yellow
Unigene0050750	yellow
Unigene0051441	yellow
Unigene0051484	yellow
Unigene0051543	yellow
Unigene0051794	yellow
Unigene0051981	yellow
Unigene0052382	yellow
Unigene0052462	yellow
Unigene0053046	yellow
Unigene0053242	yellow
Unigene0054061	yellow
Unigene0054062	yellow
Unigene0054195	yellow
Unigene0054443	yellow
Unigene0054713	yellow
Unigene0054772	yellow
Unigene0055500	yellow
Unigene0055905	yellow
Unigene0056168	yellow
Unigene0056491	yellow
Unigene0056788	yellow
Unigene0057311	yellow
Unigene0057312	yellow
Unigene0057741	yellow
Unigene0057872	yellow
Unigene0057903	yellow
Unigene0059944	yellow
Unigene0061025	yellow
Unigene0061077	yellow
Unigene0064327	yellow
Unigene0064483	yellow
Unigene0065796	yellow
Unigene0066064	yellow
Unigene0066362	yellow
Unigene0066944	yellow
Unigene0067519	yellow
Unigene0067749	yellow
Unigene0067933	yellow
Unigene0068395	yellow
Unigene0068409	yellow
Unigene0068546	yellow
Unigene0069717	yellow
Unigene0070330	yellow
Unigene0070518	yellow
Unigene0070813	yellow
Unigene0071860	yellow
Unigene0071966	yellow
Unigene0073557	yellow
Unigene0073928	yellow
Unigene0074269	yellow
Unigene0074896	yellow
Unigene0075087	yellow

## Sheet: Table S7
Table S7. Nine TFs with the highest edge weight co-expressed with the HSF1.
Gene_ID(from)	Gene_symbol(from)	Gene_ID(to)	Gene_symbol(to)	Weight
Unigene0028447	HSF1	Unigene0032864	CERS6	0.352738
Unigene0028447	HSF1	Unigene0000589	foxj1-a	0.463062
Unigene0028447	HSF1	Unigene0026354	ybx2-a	0.312097
Unigene0028447	HSF1	Unigene0052731	srfA	0.211874
Unigene0028447	HSF1	Unigene0009132	HD-1	0.229086
Unigene0028447	HSF1	Unigene0025281	HD-10	0.375844
Unigene0028447	HSF1	Unigene0058166	foxi1e	0.150378
Unigene0028447	HSF1	Unigene0014589	ZBED9	0.179167
Unigene0028447	HSF1	Unigene0057844	HD-3	0.0154628
